## Ventricular tachycardia ablation in nonischemic cardiomyopathy

Nascimento Matos D.; Cavaco D.; Carmo P.; Carvalho MS.; Rodrigues G.; Carmo J.; Galvao Santos P.; Moscoso Costa F.; Mendes M.; Morgado F.; Adragao P.

Hospital Santa Cruz, Cardiology, Carnaxide, Portugal

**Funding Acknowledgements:** Type of funding sources: None.

**INTRODUCTION:** Catheter ablation outcomes for drug-resistant ventricular tachycardia (VT) in nonischemic cardiomyopathy (NICM) are suboptimal when compared to ischemic cardiomyopathy. We aimed to analyse the long-term efficacy and safety of percutaneous catheter ablation in this subset of patients.

**METHODS:** Single-center observational retrospective registry including consecutive NICM patients who underwent catheter ablation for drug-resistant VT during a 10-year period. The efficacy endpoint was defined as VT-free survival after catheter ablation, while safety outcomes were defined by 30-days mortality and procedure-related complications. Independent predictors of VT recurrence were assessed by Cox regression.

**RESULTS:** In a population of 68 patients, most were male (85%), mean left ventricular ejection fraction (LVEF) was  $34 \pm 12\%$ , and mean age was  $58 \pm 15$  years. All patients had an implantable cardioverter-defibrillator. Twenty-six (38%) patients underwent epicardial ablation (table 1). Over a median follow-up of 3 years (IQR 1-8), 41% (n = 31) patients had VT recurrence and 28% died (n = 19). Multivariate survival analysis identified LVEF (HR= 0.98; 95%CI 0.92-0.99, p = 0.046) and VT storm at presentation (HR = 2.38; 95%CI 1.04-5.46, p = 0.041) as independent predictors of VT recurrence. The yearly rates of VT recurrence and overall mortality were 21%/year and 10%/year, respectively. No patients died at 30-days post-procedure, and mean hospital length of stay was  $5 \pm 6$  days. The complication rate was 7% (n = 5, table 1), mostly in patients undergoing epicardial ablation (4 vs 1 in endocardial ablation, P = 0.046).

**CONCLUSION:** LVEF and VT storm at presentation were independent predictors of VT recurrence in NICM patients after catheter ablation. While clinical outcomes can be improved with further technical and scientific development, a tailored endocardial/epicardial approach was safe, with low overall number of complications and no 30-days mortality.

### Abstract Figure.

Table 1: Baseline characteristics of the population

| Baseline characteristics                        | Population (N=68) |
|-------------------------------------------------|-------------------|
| Male sex – no. (%)                              | 58 (85.3)         |
| Age – mean $\pm$ SD                             | $58 \pm 15$       |
| HTN – no. (%)                                   | 39 (57.4)         |
| Dyslipidemia – no. (%)                          | 28 (41.2)         |
| Diabetes mellitus type 2 – no. (%)              | 11 (16.2)         |
| History of tobacco consumption – no. (%)        | 23 (33.8)         |
| Atrial fibrillation – no. (%)                   | 7 (10.2)          |
| NYHA class III or IV – no. (%)                  | 36 (52.9)         |
| Chronic kidney disease – no. (%)                | 26 (38.3)         |
| Beta-blocker – no. (%)                          | 66 (97.1)         |
| Amiodarone – no. (%)                            | 60 (88.2)         |
| LVEF (%) – mean $\pm$ SD                        | $34 \pm 12$       |
| RBBB-like VT morphology – no. (%)               | 47 (69.1)         |
| Electrical storm at presentation – no. (%)      | 18 (26.5)         |
| Epicardial ablation – no. (%)                   | 26 (38.2)         |
| Hospitalization duration (days) – mean $\pm$ SD | $5 \pm 6$         |
| Complications – no. (%)                         | 5 (7.3)           |
| Pericardial effusion – no. (%)                  | 2 (2.9)           |
| Right ventricle puncture – no. (%)              | 1 (1.5)           |
| Vascular complication – no. (%)                 | 1 (1.5)           |
| Complete heart block – no. (%)                  | 1 (1.5)           |

HTN=arterial hypertension; ICD=implantable cardioverter-defibrillator; LVEF=left ventricle ejection fraction; NYHA=New York Heart Association functional class; RBBB=right bundle branch block; SD=standard deviation; VT=ventricular tachycardia.
